# Supplementary material for: A new DNA marker CafLess-TCS1 for selection of caffeine-less tea plants
Source: PubMed Central journal article supplement — Breed Sci. 2019 Jun 29;69(3):393–400. doi: 10.1270/jsbbs.18161 (PMC6776138; doi:10.1270/jsbbs.18161), 2019-06-29
Supplement: 69_18161_1.pdf [file 69_18161_1.pdf]

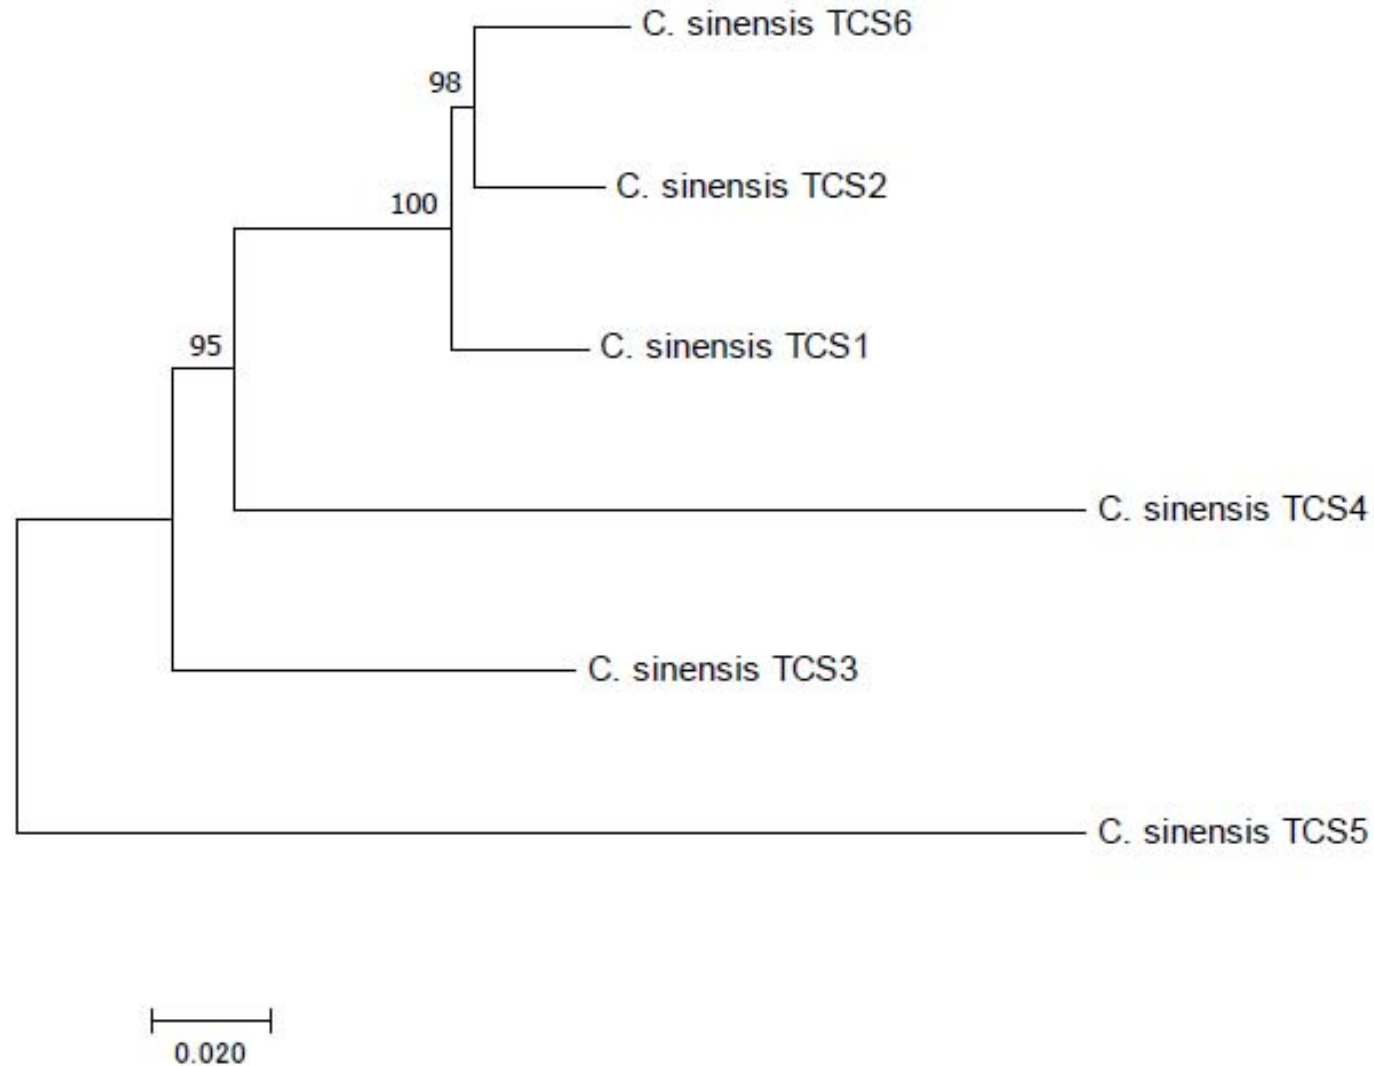

**Supplemental Fig. 1** Evolutionary relationships of *TCS* genes. The evolutionary history was inferred using the Neighbor-Joining method. The percentage of replicate trees in which the associated taxa clustered together in the bootstrap test (500 replicates) are shown next to the branches. Evolutionary analyses were conducted in MEGA7.
